# Supplementary material for: Plasma Biomarkers for Detecting Hodgkin's Lymphoma in HIV Patients
Source: PLoS One. 2011 Dec 15;6(12):e29263. doi: 10.1371/journal.pone.0029263 (PMC3240653; doi:10.1371/journal.pone.0029263)
Supplement: Table S2 — Identified significant proteins (XLSX) [file pone.0029263.s002.xlsx]

## Sheet: Sheet1
Table S2: Identified significant proteins
GENE SYMBOL	Description	#peptides/protein	Reference	Average HL positive	Average HL negative	Ratio HL positive/ HL negative
A1BG	Alpha-1B-glycoprotein precursor	27	IPI:IPI00022895.7	23.5423	24.4778	0.961783
ACTA1	Actin, alpha skeletal muscle	19	IPI:IPI00021428.1	3.3392	6.23357	0.53568
ACTB	Actin, cytoplasmic 1	25	IPI:IPI00021439.1	4.78853	4.32332	1.10761
ACTN1	Alpha-actinin-1	21	IPI:IPI00013508.5	0.78762	0.4644	1.696
AGT	Angiotensinogen precursor	23	IPI:IPI00032220.3	7.24377	9.54974	0.758531
AHSG	Alpha-2-HS-glycoprotein precursor	11	IPI:IPI00022431.1	27.4647	16.0689	1.70918
AMBP	AMBP protein precursor	6	IPI:IPI00022426.1	7.02551	15.7807	0.445196
ANPEP	Aminopeptidase N	5	IPI:IPI00221224.6	0.591233	0.735761	0.803566
APOA4	Apolipoprotein A-IV precursor	42	IPI:IPI00304273.2	4.35628	4.15691	1.04796
APOB	Apolipoprotein B-100 precursor	320	IPI:IPI00022229.1	8.33447	8.66981	0.961321
APOC1	Apolipoprotein C-I precursor	6	IPI:IPI00021855.1	1.75099	0.347582	5.03762
APOC2	Apolipoprotein C-II precursor	9	IPI:IPI00021856.3	4.94499	2.50392	1.97489
APOC3	Apolipoprotein C-III precursor	9	IPI:IPI00021857.1	3.57802	2.8593	1.25136
APOE	Apolipoprotein E precursor	25	IPI:IPI00021842.1	3.78961	1.832	2.06856
APOF	apolipoprotein F precursor	2	IPI:IPI00299435.3	1.37709	0.357516	3.85182
APOH	Beta-2-glycoprotein 1 precursor	7	IPI:IPI00298828.3	17.5186	14.9085	1.17507
APOL1	42 kDa protein	9	IPI:IPI00852826.2	0.578011	0.711504	0.812379
APOM	Apolipoprotein M	3	IPI:IPI00030739.1	2.25427	1.51067	1.49223
ARHGDIB	Rho GDP-dissociation inhibitor 2	4	IPI:IPI00003817.3	0.276847	2.0562	0.13464
ASL	Argininosuccinate lyase	2	IPI:IPI00220267.7	0.362218	0.582379	0.621962
AZGP1	alpha-2-glycoprotein 1, zinc	15	IPI:IPI00166729.4	7.06327	11.5899	0.609432
B2M	Beta-2-microglobulin	5	IPI:IPI00868938.1	1.08477	1.76906	0.613187
BCHE	Cholinesterase precursor	13	IPI:IPI00025864.5	1.05969	0.668991	1.58402
BLVRB	Flavin reductase	2	IPI:IPI00783862.2	0.390423	0.51261	0.761637
BTD	biotinidase precursor	8	IPI:IPI00218413.2	0.673096	0.8784	0.766275
C1QA	Complement C1q subcomponent subunit A precursor	3	IPI:IPI00022392.1	1.02798	1.17153	0.877473
C1QB	complement component 1, q subcomponent, B chain precursor	5	IPI:IPI00477992.1	0.962688	0.655283	1.46912
C1R	Complement C1r subcomponent precursor	13	IPI:IPI00296165.5	1.02295	0.904146	1.1314
C1RL	Complement C1r-like protein	9	IPI:IPI00009793.3	0.322735	0.403346	0.800144
C1S	Complement C1s subcomponent precursor	18	IPI:IPI00017696.1	1.09315	1.2058	0.906576
C2	Complement C2 precursor (Fragment)	27	IPI:IPI00303963.1	1.6403	1.4495	1.13163
C3	Complement C3 precursor (Fragment)	216	IPI:IPI00783987.2	16.7532	16.3665	1.02363
C4A	Complement component 4A	126	IPI:IPI00643525.1	13.8774	10.7573	1.29004
C4B	C4B1	128	IPI:IPI00418163.3	18.7967	12.7834	1.4704
C4BPA	C4b-binding protein alpha chain precursor	9	IPI:IPI00021727.1	0.515672	0.478198	1.07837
C5	Complement C5 precursor	76	IPI:IPI00032291.2	2.48345	2.95248	0.841142
C6	Complement component 6 precursor	25	IPI:IPI00009920.2	1.08453	1.29313	0.838687
C7	Complement component C7 precursor	21	IPI:IPI00296608.6	1.36095	1.48317	0.917592
C8A	Complement component C8 alpha chain precursor	18	IPI:IPI00011252.1	1.72473	2.91015	0.592661
C8B	Complement component C8 beta chain precursor	18	IPI:IPI00294395.1	2.12162	1.94539	1.09059
C9	Complement component C9 precursor	24	IPI:IPI00022395.1	3.43615	3.13597	1.09572
CA1	Carbonic anhydrase 1	6	IPI:IPI00215983.3	1.32273	1.21226	1.09112
CD14	Monocyte differentiation antigen CD14 precursor	7	IPI:IPI00029260.2	0.392457	0.269517	1.45615
CDH5	Cadherin-5 precursor	2	IPI:IPI00012792.1	0.373491	0.267923	1.39403
CECR1	Cat eye syndrome critical region protein 1 precursor	2	IPI:IPI00303071.4	5.30937	0.632144	8.39899
CFB	Isoform 1 of Complement factor B precursor (Fragment)	43	IPI:IPI00019591.1	10.4873	9.81352	1.06866
CFD	Complement factor D preproprotein	4	IPI:IPI00165972.3	0.283128	1.40245	0.20188
CFH	Isoform 1 of Complement factor H precursor	28	IPI:IPI00029739.5	4.03733	4.34235	0.929755
CFI	Complement factor I precursor	13	IPI:IPI00291867.3	2.03804	2.54736	0.80006
CFL1	Cofilin-1	6	IPI:IPI00012011.6	0.513216	0.5124	1.00159
CLEC3B	Tetranectin precursor	6	IPI:IPI00009028.1	1.26404	1.00676	1.25555
CNDP1	Beta-Ala-His dipeptidase precursor	21	IPI:IPI00064667.4	0.441297	0.441232	1.00015
CNTN1	Isoform 1 of Contactin-1 precursor	2	IPI:IPI00029751.1	1.14696	0.485393	2.36294
COL6A3	alpha 3 type VI collagen isoform 1 precursor	3	IPI:IPI00022200.2	0.578945	24.5494	0.0235829
CP	Ceruloplasmin precursor	78	IPI:IPI00017601.1	6.3988	6.07339	1.05358
CPB2	Isoform 1 of Carboxypeptidase B2 precursor	13	IPI:IPI00329775.7	0.708521	0.831739	0.851855
CPN1	Carboxypeptidase N catalytic chain precursor	10	IPI:IPI00010295.1	0.543993	0.654576	0.831062
CPN2	similar to Carboxypeptidase N subunit 2 precursor	14	IPI:IPI00738433.1	1.42743	1.59781	0.893368
CRP	Isoform 1 of C-reactive protein precursor	9	IPI:IPI00022389.1	15.2352	3.23557	4.70866
CST3	Cystatin-C precursor	3	IPI:IPI00032293.1	1.64139	1.043	1.57372
ECM1	Extracellular matrix protein 1	10	IPI:IPI00645849.1	0.357701	0.383118	0.933659
EFEMP1	Isoform 1 of EGF-containing fibulin-like extracellular matrix protein 1 precursor	4	IPI:IPI00029658.1	0.214563	0.407459	0.526589
F10	Coagulation factor X precursor	9	IPI:IPI00019576.1	0.822717	1.18731	0.692926
F11	Isoform 1 of Coagulation factor XI precursor	8	IPI:IPI00008556.1	0.242055	0.259496	0.932789
F2	Prothrombin precursor (Fragment)	20	IPI:IPI00019568.1	6.98042	6.10166	1.14402
F5	Coagulation factor V	14	IPI:IPI00022937.4	0.424884	0.337926	1.25733
FCGBP	IgGFc-binding protein precursor	4	IPI:IPI00242956.4	1.8787	1.54891	1.21292
FCN3	Isoform 1 of Ficolin-3 precursor	9	IPI:IPI00293925.2	3.78361	4.00405	0.944947
FGA	Isoform 1 of Fibrinogen alpha chain precursor	41	IPI:IPI00021885.1	2.54727	0.962944	2.64529
FLNA	filamin A, alpha isoform 1	48	IPI:IPI00302592.2	0.514826	0.422628	1.21815
FN1	Isoform 1 of Fibronectin precursor	19	IPI:IPI00022418.1	0.372758	0.40013	0.931591
GAPDH	Glyceraldehyde-3-phosphate dehydrogenase	7	IPI:IPI00219018.7	0.929287	1.05671	0.879415
GC	Vitamin D-binding protein precursor	32	IPI:IPI00555812.4	13.4458	10.9019	1.23335
GGH	Gamma-glutamyl hydrolase precursor	4	IPI:IPI00023728.1	5.74214	4.70606	1.22016
GP1BA	platelet glycoprotein Ib alpha polypeptide precursor	5	IPI:IPI00748955.2	0.519652	0.66518	0.781221
GPLD1	Isoform 1 of Phosphatidylinositol-glycan-specific phospholipase D precursor	11	IPI:IPI00299503.2	2.04247	0.353795	5.77303
GSN	Isoform 1 of Gelsolin precursor	44	IPI:IPI00026314.1	1.63893	2.83747	0.577603
HBA2	Hemoglobin subunit alpha	9	IPI:IPI00410714.5	4.70749	4.2453	1.10887
HGFAC	Hepatocyte growth factor activator precursor	5	IPI:IPI00029193.1	0.423408	0.418215	1.01242
HPR	Isoform 1 of Haptoglobin-related protein precursor	15	IPI:IPI00477597.1	1.73348	1.72228	1.00651
HPX	Hemopexin precursor	39	IPI:IPI00022488.1	12.5002	13.5278	0.924037
HRG	Histidine-rich glycoprotein precursor	21	IPI:IPI00022371.1	7.88609	9.94014	0.793358
HSPA8	Heat shock 70kDa protein 8 isoform 2 variant (Fragment)	7	IPI:IPI00795040.1	0.503347	0.515208	0.97698
ICAM1	Intercellular adhesion molecule 1 precursor	3	IPI:IPI00008494.4	0.798069	0.622943	1.28113
IGFALS	Insulin-like growth factor-binding protein complex acid labile chain precursor	20	IPI:IPI00020996.3	1.00583	1.11852	0.899248
IGFBP2	Insulin-like growth factor-binding protein 2 precursor	2	IPI:IPI00297284.1	0.281175	0.167023	1.68345
IGFBP6	Insulin-like growth factor-binding protein 6 precursor	2	IPI:IPI00029235.1	0.257229	0.246688	1.04273
ITIH1	Inter-alpha-trypsin inhibitor heavy chain H1 precursor	38	IPI:IPI00292530.1	4.27631	5.84158	0.732047
ITIH2	Inter-alpha-trypsin inhibitor heavy chain H2 precursor	62	IPI:IPI00305461.2	5.38857	7.95156	0.677674
ITIH3	Isoform 1 of Inter-alpha-trypsin inhibitor heavy chain H3 precursor	28	IPI:IPI00028413.8	1.9074	2.40768	0.792214
ITIH4	Isoform 1 of Inter-alpha-trypsin inhibitor heavy chain H4 precursor	53	IPI:IPI00294193.4	8.60448	8.89227	0.967636
KLKB1	Plasma kallikrein precursor	16	IPI:IPI00654888.4	1.73456	1.98594	0.873419
KNG1	Kininogen-1	16	IPI:IPI00032328.2	17.2426	21.4597	0.803486
KRT10	Keratin, type I cytoskeletal 10	9	IPI:IPI00009865.2	1.71599	2.67423	0.641676
KRT2	Keratin, type II cytoskeletal 2 epidermal	4	IPI:IPI00021304.1	2.87105	1.04759	2.74062
LBP	Lipopolysaccharide-binding protein precursor	8	IPI:IPI00032311.4	0.537749	0.41605	1.29251
LCP1	Plastin-2	7	IPI:IPI00010471.5	0.310855	0.251469	1.23616
LDHB	L-lactate dehydrogenase B chain	9	IPI:IPI00219217.3	1.92046	0.924529	2.07723
LPA	Apolipoprotein	11	IPI:IPI00029168.1	0.440028	0.610102	0.721237
LRG1	Leucine-rich alpha-2-glycoprotein precursor	12	IPI:IPI00022417.4	15.4372	11.5954	1.33133
LUM	Lumican precursor	11	IPI:IPI00020986.2	1.81649	4.42555	0.410457
MASP1	mannan-binding lectin serine protease 1 isoform 2 precursor	5	IPI:IPI00290283.6	0.245675	0.432003	0.568689
MBL2	Mannose-binding protein C precursor	5	IPI:IPI00004373.1	1.26431	0.425919	2.96842
MCAM	Isoform 1 of Cell surface glycoprotein MUC18 precursor	2	IPI:IPI00016334.2	2.49155	1.39058	1.79173
MSN	Moesin	4	IPI:IPI00219365.3	1.8955	0.618384	3.06525
MTMR15	Isoform 1 of Coiled-coil domain-containing protein MTMR15	2	IPI:IPI00007317.4	9.30193	8.87965	1.04756
PCYOX1	Prenylcysteine oxidase 1 precursor	2	IPI:IPI00384280.5	0.185022	0.206548	0.895783
PDIA3	Protein disulfide-isomerase A3 precursor	4	IPI:IPI00025252.1	0.27453	0.401011	0.684594
PFN1	Profilin-1	9	IPI:IPI00216691.5	1.11893	1.38091	0.810286
PGLYRP2	Isoform 1 of N-acetylmuramoyl-L-alanine amidase precursor	12	IPI:IPI00163207.1	1.18744	2.01576	0.58908
PI16	Isoform 1 of Peptidase inhibitor 16 precursor	3	IPI:IPI00301143.5	0.601847	0.407614	1.47651
PLEK	Pleckstrin	5	IPI:IPI00306311.8	0.529043	0.523856	1.0099
PNP	Purine nucleoside phosphorylase	2	IPI:IPI00871140.1	1.80286	3.37217	0.534631
PPBP	Platelet basic protein precursor	5	IPI:IPI00022445.1	0.623776	0.383634	1.62597
PRDX2	Peroxiredoxin-2	4	IPI:IPI00027350.3	0.54433	0.710727	0.765877
PROZ	Isoform 1 of Vitamin K-dependent protein Z precursor	3	IPI:IPI00027843.1	0.230455	0.302011	0.763069
PTGDS	Prostaglandin-H2 D-isomerase precursor	3	IPI:IPI00013179.1	0.281904	4.3375	0.0649924
PVR	Isoform Beta of Poliovirus receptor precursor	2	IPI:IPI00219425.3	0.0856866	0.152251	0.562798
PZP	Pregnancy zone protein precursor	12	IPI:IPI00025426.2	0.552312	0.256498	2.15328
QSOX1	Isoform 1 of Sulfhydryl oxidase 1 precursor	2	IPI:IPI00003590.2	0.373302	0.119172	3.13247
RBP4	Plasma retinol-binding protein precursor	10	IPI:IPI00022420.3	8.56973	6.59049	1.30032
RELN	reelin isoform a	2	IPI:IPI00241562.4	0.835055	0.884305	0.944306
SAA1	serum amyloid A2	7	IPI:IPI00006146.4	1.45088	0.508147	2.85523
SAA2	Serum amyloid A protein precursor	8	IPI:IPI00552578.2	3.83568	2.1922	1.74969
SAA4	Serum amyloid A-4 protein precursor	8	IPI:IPI00019399.1	1.20416	0.932457	1.29139
SELENBP1	Selenium-binding protein 1	2	IPI:IPI00012303.2	11.8538	20.4659	0.579197
SEMA7A	Semaphorin-7A precursor	2	IPI:IPI00025257.1	2.02266	1.15229	1.75534
SEPP1	Selenoprotein P precursor	3	IPI:IPI00029061.2	0.559172	0.828843	0.674641
SERPINA10	Protein Z-dependent protease inhibitor precursor	9	IPI:IPI00007199.4	0.334332	0.293792	1.13799
SERPINA3	Alpha-1-antichymotrypsin precursor	50	IPI:IPI00550991.3	18.1817	16.8031	1.08205
SERPINA4	Kallistatin precursor	19	IPI:IPI00328609.3	1.08859	1.49775	0.726817
SERPINA7	Thyroxine-binding globulin precursor	20	IPI:IPI00292946.1	2.09158	1.88834	1.10763
SERPINC1	Antithrombin III variant	49	IPI:IPI00032179.2	7.25715	7.87453	0.921598
SERPINC1	SERPINC1 protein	27	IPI:IPI00844156.2	4.64656	4.06486	1.14311
SERPIND1	Serpin peptidase inhibitor, clade D (Heparin cofactor), member 1	22	IPI:IPI00292950.4	5.63426	5.30479	1.06211
SERPINF1	Pigment epithelium-derived factor precursor	27	IPI:IPI00006114.4	2.07028	2.82576	0.732644
SERPINF2	Alpha-2-antiplasmin precursor	24	IPI:IPI00879231.1	6.3433	6.16878	1.02829
SERPING1	Plasma protease C1 inhibitor precursor	42	IPI:IPI00291866.5	7.43381	10.5834	0.702406
SHBG	Isoform 1 of Sex hormone-binding globulin precursor	10	IPI:IPI00023019.1	0.327382	0.419297	0.780787
TAGLN2	Transgelin-2	6	IPI:IPI00550363.3	0.416104	0.305488	1.3621
THBS1	Thrombospondin-1 precursor	18	IPI:IPI00296099.6	0.488286	0.37381	1.30624
TIMP1	Metalloproteinase inhibitor 1 precursor	2	IPI:IPI00032292.1	0.738735	3.51389	0.210233
TLN1	Talin-1	40	IPI:IPI00298994.6	0.832287	0.386247	2.1548
TNC	Isoform 1 of Tenascin precursor	3	IPI:IPI00031008.1	0.905723	0.938056	0.965532
TPM2	Tropomyosin 2	4	IPI:IPI00513698.1	0.374984	0.32002	1.17175
TTR	Transthyretin precursor	19	IPI:IPI00022432.1	6.96448	9.74416	0.714734
VASN	Vasorin precursor	3	IPI:IPI00395488.2	0.245036	0.318319	0.769782
VCL	Isoform 1 of Vinculin	20	IPI:IPI00291175.7	0.350836	0.249935	1.40371
VTN	Vitronectin precursor	15	IPI:IPI00298971.1	9.9242	10.687	0.92862
VWF	von Willebrand factor precursor	25	IPI:IPI00023014.1	1.33877	1.09494	1.22269
YWHAB	Isoform Short of 14-3-3 protein beta/alpha	4	IPI:IPI00759832.1	0.281139	0.230754	1.21835
YWHAG	14-3-3 protein gamma	4	IPI:IPI00220642.7	0.369232	0.625696	0.590114
